# Supplementary material
Source: Springer Nature journal article supplement (https://repositorio.tec.mx/bitstream/handle/11285/613677/12952_2006_45_MOESM3_ESM.pdf)
Supplement: MOESM3 [file 12952_2006_45_MOESM3_ESM.pdf]

A

Norm. Fluoro.

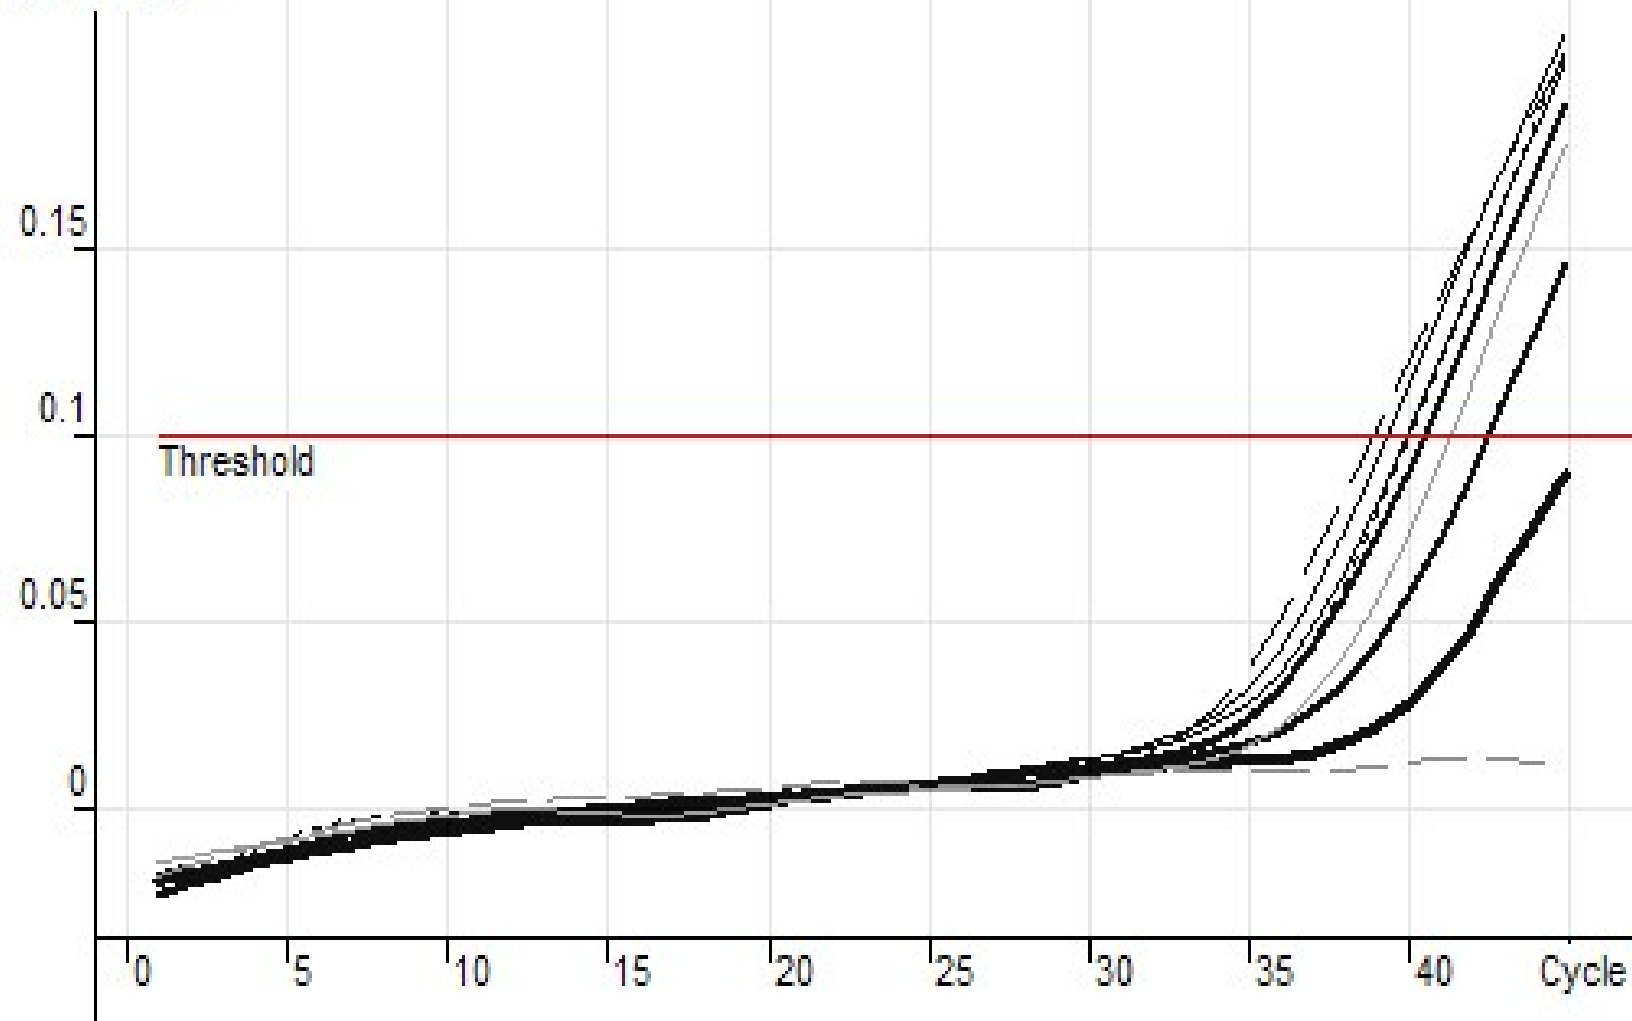

B

|   | Color    | Sample        | Ct    | Calc Conc (copies/ul)  | T/T        |
|---|----------|---------------|-------|------------------------|------------|
| 1 | Dashed   | Rat 1 Group 1 | 39.02 | 2 per 1 $\mu$ g of DNA | 552 copies |
| 2 | Solid    | Rat 2 Group 1 | 39.45 | 2 per 1 $\mu$ g of DNA | 208 copies |
| 3 | Dotted   | Rat 4 Group 1 | 40.18 | 1 per 1 $\mu$ g of DNA | 810 copies |
| 4 | Hairline | Rat 1 Group 2 | 40.07 | 1 per 1 $\mu$ g of DNA | 196 copies |
| 5 | Thin     | Rat 2 Group 2 | 42.61 | 0                      | 0          |
| 6 | Thin     | Rat 4 Group 2 | 40.59 | 1 per 1 $\mu$ g of DNA | 96 copies  |
| 7 | Thick    | Rat 5 Group 2 |       | 0                      | 0          |
| 8 | Solid    | Rat 4 Group 3 | 41.42 | 0                      | 0          |
| 9 | Dashed   | Neg. Control  |       | 0                      | 0          |
